1 **Full title: Dynamic adaptations in the echolocation behavior of bats in response to**  
2 **acoustic interference**

3

4 **Short title: Dynamic adaptations to avoid acoustic interference**

5

6 M. Jerome Beetz (\*)<sup>1,2</sup>, Manfred Kössl<sup>1</sup>, Julio C. Hechavarría<sup>1</sup>

7

8

9

10 **Affiliations**

11 <sup>1</sup>Institut für Zellbiologie und Neurowissenschaft, Goethe-Universität, Frankfurt/M., Germany

12 <sup>2</sup> current address: Zoology II Emmy-Noether Animal Navigation Group, Biocenter, University of

13 Würzburg, Germany

14

15 \* Corresponding author

16 ***Mailing address:***

17 M. Jerome Beetz

18 Email: [jerome.beetz@uni-wuerzburg.de](mailto:jerome.beetz@uni-wuerzburg.de)

19 Zoology II, University of Wuerzburg, Am Hubland, 97074, Wuerzburg, Germany, Tel.: +49

20 9313184528

21

22

23

24 **Abstract**

25       Animals must extract relevant sensory information out of a multitude of non-informative and  
26 sometimes interfering stimuli. For orientation, bats rely on broadcasted calls and they must assign each  
27 echo to the corresponding call. When bats orient in acoustically enriched environments, call-echo  
28 assignment becomes challenging due to signal interference. Bats often adapt echolocation parameters  
29 which potentially improves signal extraction. However, they also adjust echolocation parameters with  
30 respect to target distance. To characterize adaptations that are exclusively elicited to minimize signal  
31 interference, we tested the effect of acoustic playback on the echolocation behavior of the fruit-eating  
32 bat, *Carollia perspicillata*. Hereby, distance-dependent changes were considered by swinging bats in a  
33 pendulum and directly measuring the object distance. Acoustic playback evoked different call  
34 adjustments in parameters such as bandwidth, peak-frequency, duration and call level. These  
35 adaptations were highly dynamic and could vary across individuals, days, trials, and even within trials.  
36 Our results demonstrate that bats do not only change one echolocation parameter when orienting in  
37 acoustically enriched environments. They rather have a tool-kit of different behavioral adaptations to  
38 cope with interfering acoustic stimuli. By dynamically switching between different adaptations, bats  
39 can maximize the extraction of their biosonar signals from the background.

40

## 41 **Introduction**

42           Animals extract behaviorally relevant information (signal) out of the mass of stimuli that they  
43 are daily confronted with. Echolocation represents a popular example where the broadcaster needs to  
44 discriminate its biosonar signals from the signals of adjacent conspecifics (background) (1, 2). For  
45 orientation, bats emit biosonar calls and listen to echoes arising from call reflections off surrounding  
46 objects (3-5). Spectro-temporal parameters of the echoes inform the animals about position and  
47 identity of close-by obstacles (6). To gain spatial information, bats need to assign the echoes to the  
48 corresponding calls (2, 7, 8). Call-echo assignment becomes challenging when biosonar signals  
49 broadcasted by multiple bats overlap with each other (9, 10). Under these circumstances, bats  
50 demonstrate different behavioral adaptations that have been discussed to improve call-echo assignment  
51 (7, 11-30). These adaptations range from spectro-temporal changes of the call design, to changes in the  
52 call emission pattern. This large variety of adaptations is contrasted by the adaptation that  
53 electrolocating fish demonstrate (31, 32). Here, the fishes shift their signal frequency away from each  
54 other so that each individual fish occupies a specific frequency. It remains controversial, why bats  
55 employ such a large variety of different adaptations when biosonar signals from multiple bats overlap  
56 with each other.

57           The present study answers three different questions that may explain the large variability of  
58 adaptations seen in bats: i) is there an individual-specificity in which each individual-bat shows  
59 (“prefers”) a particular adaptation? ii) is there context dependency? If there is context dependency,  
60 then individual bats should show the same adaptations under a constant behavioral context. iii) do bats  
61 follow multiple adaptation-strategies in parallel and can they dynamically switch between different  
62 adaptations? If this is the case, then bats may be able to switch their adaptations strategies while  
63 echolocating.

64           To answer these questions, individual bats of the species *Carollia perspicillata* were attached  
65 on a platform in the mass of a swinging pendulum (Figure 1A). During the forward swing – which  
66 mimicked an approach flight – the animals were acoustically stimulated with patterned echolocation  
67 calls broadcasted from a speaker that travelled with and was pointing towards the animal (test trial).  
68 Call design and emission pattern of test trials were compared with the ones recorded during control

69 trials where bats were swung in the absence of playback stimuli. We observed that during test trials,  
70 bats changed different echolocation parameters including call level and call frequency composition.  
71 These parameters were changed independently from each other indicating that bats could dynamically  
72 adjust their biosonar emissions to improve signal discriminability from the playback stimuli. To our  
73 surprise, bats dynamically varied the adapted echolocation parameters across days, trials and even  
74 within trials. The large variability of adaptations can neither be explained by individual-specificity nor  
75 by context dependency because individual bats dynamically switched between adaptation strategies  
76 when they were repetitively confronted with the same behavioral context. We argue that each  
77 individual bat may profit from a tool-kit of different behavioral adaptations. By dynamically  
78 combining different adaptations, bats can create unique and distinguishable echolocation streams  
79 which may support correct call-echo assignment in natural scenarios where many bats echolocate in  
80 proximity to each other.

81

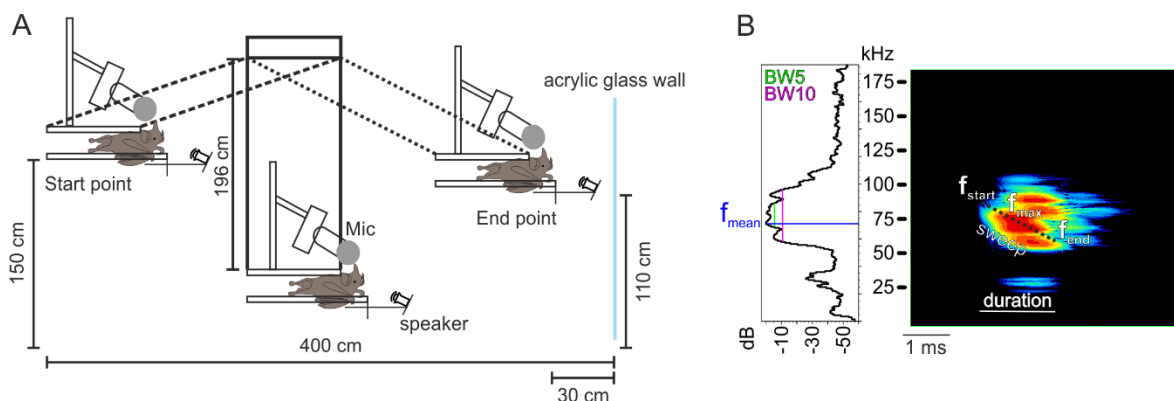

82

### 83 **Fig. 1 Behavioral paradigm and representative echolocation call**

84 (A) Schematic side view of the pendulum paradigm. The bat was positioned in the mass of a  
85 pendulum and it was swung towards an acrylic glass wall. During the swing the bat emitted  
86 echolocation calls which were recorded together with the echoes by an ultrasound microphone (Mic).  
87 For test trials, the bat was stimulated with playback echolocation sequences that were composed of a  
88 previously recorded echolocation call of the tested bat. The playback stimuli were emitted with a  
89 speaker that was pointing towards the bat's head. Microphone and speaker were travelling with the bat  
90 and had a constant distance to the bat's head throughout the experiments. (B) Power spectrum (left)  
91 and spectrogram (right) of a representative echolocation call recorded with the pendulum paradigm.

92 Different call parameters were measured to characterize spectro-temporal call properties. Spectral  
93 parameters that were measured included initial ( $f_{\text{start}}$ ), centre ( $f_{\text{centre}}$ ), terminal ( $f_{\text{end}}$ ), mean ( $f_{\text{mean}}$ ),  
94 maximum amplitude ( $f_{\text{max}}$ ) peak frequency, and bandwidths at five (BW5) and ten dB (BW10) below  
95 the  $f_{\text{mean}}$ . Call duration represents one of the temporal echolocation parameters that were considered in  
96 the analysis. The sweep rate represents the difference of  $f_{\text{end}}$  and  $f_{\text{start}}$  ( $f_{\text{end}} - f_{\text{start}}$ ) divided by the call  
97 duration.

## 98 **Results**

### 99 **Playback stimuli evoke individual specific changes of the echolocation behavior**

100 To exclude changes in the echolocation behavior associated with the behavioral context – like  
101 the animal’s flight path –, we repetitively presented the bat with an invariant context. This was  
102 achieved by positioning a bat in the mass of a pendulum and swinging the animal towards an acrylic  
103 glass wall (Figure 1A). The forward swing mimics an approach flight and the bat broadcasted  
104 echolocation calls (Figure 2) during the swing. Echolocation calls and echoes were recorded by an  
105 ultrasound sensitive microphone. The microphone was positioned above the animal’s head and it was  
106 pointed towards the bat’s heading direction.

107 To test how an acoustic interferer effects the echolocation behavior, an echolocation sequence  
108 (playback stimulus) was presented from a speaker, during the test trials. The speaker was positioned  
109 20 cm in front and pointing towards the bat’s head. The short distance between the speaker and the  
110 animal and the relatively tight fixation of the bat’s head prevented situations in which the bat could  
111 reduce acoustic interference by motor responses like head “wagging” (33). Therefore, in our  
112 experimental paradigm, bats rely mostly on changes in call design or emission pattern to minimize  
113 signal interference. An echolocation call from the tested bat served as building block for the playback  
114 stimulus (see methods for details). Thus, for each animal and experimental day, a new  
115 “individualized” playback stimulus was constructed (for stimulus details see methods and Table 1). In  
116 total, the echolocation behavior in the presence of playback stimuli was characterized in ten bats (5  
117 females and 5 males).

118

119 **Table 1 Call parameters of the playback stimuli.** Each animal was stimulated with one of  
 120 its own echolocation calls to ensure a high probability of acoustic interference. Since some call  
 121 parameters change across days within an individual, a new jamming stimulus was generated each day.  
 122 BW = bandwidth; p f = peak frequency

| animal (day) | call duration [ms] | intensity rms [dB] | p f start [kHz] | p f end [kHz] | p f centre [kHz] | p f max [kHz] | p f mean [kHz] | BW5 [kHz] | BW10 [kHz] | sweep rate [kHz/ms] |
|--------------|--------------------|--------------------|-----------------|---------------|------------------|---------------|----------------|-----------|------------|---------------------|
| f8 (1)       | 1,57               | 80,13              | 68,8            | 68,1          | 67,3             | 68,1          | 68,1           | 4,3       | 20,5       | -0,446              |
| f8 (2)       | 1,62               | 83,77              | 82              | 82            | 82,7             | 82            | 82             | 9,5       | 12,4       | 0,000               |
| f9 (1)       | 1,94               | 87,02              | 61,5            | 82            | 82               | 82            | 82,7           | 27        | 30         | 10,567              |
| f9 (2)       | 1,64               | 78,8               | 80,5            | 90,8          | 87,1             | 87,1          | 87,1           | 11,7      | 27,8       | 6,280               |
| f10 (1)      | 1,85               | 85,86              | 68,1            | 85,6          | 82,7             | 86,4          | 85,6           | 16,8      | 28,5       | 9,459               |
| f11 (1)      | 2,34               | 84,9               | 74,7            | 76,9          | 82               | 82            | 82             | 21,2      | 29,2       | 0,940               |
| f11 (2)      | 2                  | 78,13              | 69,5            | 79,8          | 85,6             | 86,4          | 86,4           | 7,3       | 13,1       | 5,150               |
| f12 (1)      | 1,96               | 85,6               | 74,7            | 79,1          | 79,1             | 85,6          | 79,1           | 19        | 24,1       | 2,245               |
| f12 (2)      | 2,15               | 80,25              | 80,5            | 82            | 82,7             | 87,1          | 82,7           | 10,2      | 27         | 0,698               |
| m9 (1)       | 2,04               | 87,08              | 79,1            | 84,2          | 82,7             | 71            | 71             | 33,6      | 38,8       | 2,500               |
| m9 (2)       | 2,3                | 83,95              | 78,3            | 82,7          | 82,7             | 82,7          | 82,7           | 5,1       | 22,7       | 1,913               |
| m10 (1)      | 2,21               | 86,72              | 71              | 80,5          | 80,5             | 81,2          | 80,5           | 5,8       | 10,2       | 4,299               |
| m10 (2)      | 1,62               | 82,25              | 67,3            | 84,9          | 82               | 87,1          | 82,7           | 9,5       | 32,9       | 10,864              |
| m11 (1)      | 1,68               | 81,53              | 70,3            | 81,2          | 82               | 82            | 82,7           | 5,1       | 10,9       | 6,488               |
| m12 (1)      | 1,4                | 83,57              | 79,1            | 66,6          | 61,5             | 79,1          | 67,3           | 23,4      | 24,9       | -8,929              |
| m12 (2)      | 1,53               | 77,23              | 79,8            | 89,3          | 87,8             | 87,8          | 87,8           | 4,3       | 27,8       | 6,209               |
| m13 (1)      | 2,64               | 84,92              | 72,5            | 82            | 82,7             | 85,6          | 82,7           | 7,3       | 11,7       | 3,598               |
| m13 (2)      | 2                  | 76,35              | 67,3            | 81,2          | 80,5             | 82            | 80,5           | 10,9      | 33,6       | 6,950               |

123  
 124  
 125 The echolocation behavior recorded in the presence of the playback stimuli was compared  
 126 with the behavior recorded during an initial control trial in which no stimulus was played back. Since  
 127 bats adjust the call design and emission pattern with distance to obstacles, we pooled the calls into two  
 128 groups, namely “long delay calls” and “short delay calls”. Echolocation calls that were broadcasted as  
 129 the bat was farther than 1 m away from the acrylic glass wall were defined as “long delay calls”. Here,  
 130 the echoes are delayed by more than 6 ms from the calls. Accordingly, echolocation calls that were  
 131 emitted when the bat was closer than 1 m from the acrylic glass wall were defined as “short delay  
 132 calls” (echo delays equal to or shorter than 6 ms).

133           When echolocating in the presence of the playback stimulus, bats adapted their echolocation  
134 behavior in an individual dependent manner (Table 2). Four bats (female/F11; F12; male/M9; M12)  
135 increased the tendency of grouping their call emissions (exemplarily shown for F11 in Figure 2A;  
136 Figure 2E). Three bats (F8, M9, M13) increased the call intensity during the test trials (Table 2; Figure  
137 2B). One bat (M11) decreased the call intensity of the “long delay calls”. Five bats changed their call  
138 duration, two shortened (F8, M11), two lengthened (M9, M10) and one shortened the “short delay  
139 calls” and lengthened the “long delay calls” (F9, Figure 3B; Table 2). The adaptation in call duration  
140 of F9 demonstrates that some bats differently adapt “long delay calls”, and “short delay calls” in  
141 response to the playback stimulus. Changes in the call spectra were sometimes prominent (Figure 2C  
142 and 2D) but also variable when comparing across animals (Table 2). Calls shown in figure 2C and 2D  
143 were recorded as the bat had approximately the same distance from the acrylic glass wall (~2 m).  
144 Changes in the call sweep rate varied less across animals. Seven out of eight bats that changed the  
145 sweep rate of the calls decreased the sweep rate. In other words, the call frequency changed more  
146 slowly during the test than during control trials (Table 2). Changes in the sweep rate could either  
147 derive from changes in the frequency range that the call covers or by changing the call duration. Since  
148 lowering the sweep rate was not associated with lengthening the call, the sweep rate was mainly  
149 affected by changes in the frequency range. Eight animals (80%) changed either the BW5 or BW10 of  
150 the calls in the test trials. These changes could either be a BW decrease (shown by 40% of the bats  
151 tested; F8, F10, M11, M13) or an increase (shown by 40%; F9, F11, F12, M9). Detailed data from  
152 three animals (A: F8; B: F9; C: M9) are plotted as boxplots in figure 3A-3C. For reasons of  
153 visualization, only parameters that changed statistically during the test trials are shown. Data from the  
154 remaining animals are presented in figure S1. In summary, each animal changed at least one call  
155 parameter in response to the playback stimuli. Only, M11 did not change the call design of the short  
156 delay calls during the test trials. The changes were shown in different combinations and directions,  
157 meaning that there was no single common behavioral adaptation induced by the playback stimuli.  
158  
159



160 **Table 2 Changes of the call parameters induced by the presence of playback stimuli.** +=

161 higher values for test than for control trials (+=  $p < 0.05$ ; ++  $p < 0.01$ ; +++  $p < 0.001$ ); - = lower

162 values for test than for control trials (- =  $p < 0.05$ ; --  $p < 0.01$ ; ---  $p < 0.001$ ); F = female; M = male; l =

163 long delay calls; p f = peak frequency; s = short delay calls

| Animal ID  | F8  |     | F9  |     | F10 |    | F11 |    | F12 |    | M9  |    | M10 |   | M11 |   | M12 |   | M13 |    |
|------------|-----|-----|-----|-----|-----|----|-----|----|-----|----|-----|----|-----|---|-----|---|-----|---|-----|----|
|            | l   | s   | l   | s   | l   | s  | l   | s  | l   | s  | l   | s  | l   | s | l   | s | l   | s | l   | s  |
| Delay      | ++  | +++ |     |     | +   | ++ | --  |    | --  |    |     |    | ++  | + |     |   | +   |   | --  |    |
| Interval   | -   |     | +++ | --- |     |    |     |    |     |    | +   |    | +   |   | --  |   |     |   |     |    |
| Duration   |     | +++ |     |     |     |    |     |    |     |    |     |    |     |   |     |   |     |   |     |    |
| Intensity  |     |     |     |     |     |    |     |    |     |    |     | ++ |     |   | --  |   |     |   |     | ++ |
| P F start  |     |     | -   | --- |     |    | +   |    | +   |    | --- |    |     |   |     |   |     |   |     |    |
| Sweep rate |     | --- | --- |     | --  | -  |     | -  | +   |    | --  |    | --  |   |     |   | -   |   |     |    |
| P F end    |     | +++ |     |     | +   |    |     |    |     |    |     |    | --- | - | --- |   | --  |   |     |    |
| P F max    |     |     | --- | --  | --  |    |     | -  |     | -  |     |    | --  |   |     |   | ++  |   |     |    |
| P F mean   |     |     | --- | --  |     |    |     | -- |     | -- |     |    |     |   |     |   |     |   |     |    |
| BW5        | --- |     |     | ++  |     |    |     |    |     |    |     | +  |     |   |     |   |     |   |     |    |
| BW10       | --- |     |     | +++ | --- |    | ++  |    | ++  |    |     | +  |     |   | --  |   |     |   |     | -  |

164



166 **Fig. 2 Exemplary adaptations of the echolocation behavior in response to the playback stimuli**  
167 (A) Oscillograms of one control trial (top), the playback stimulus (middle), and one test trial (bottom)  
168 from female 11 (F11). Time points of call emissions are indicated by black or red dots above each  
169 oscillogram. During the control trial, the bat did not emit echolocation call groups. During the test  
170 trial, the bat grouped some calls into doublets (indicated by the number 2) or triplets (indicated by a  
171 “3”). Note that the jamming stimulus was recorded in addition to the echolocation calls of the test trial.  
172 Thus, oscillogram deflections without a dot represent signals coming from the playback stimulus. (B)  
173 Oscillogram of one control trial (top), the playback stimulus (middle) and one test trial (bottom) from  
174 female 8 (F8). In comparison to the calls emitted during the control trials, the call intensity of the calls  
175 was increased during the test trials. Numbers above each emitted call indicate the call intensity. (C-D)  
176 Power spectra (left) and spectrograms (right) of representative calls emitted during the control and test  
177 trial for two individuals (F11, M11). To exclude distance dependent changes in the call design, all four  
178 calls were recorded as the bat was ~2 meters away from the acrylic wall. Both bats decreased the  
179 bandwidth and mean peak frequency of the calls during the test trials when compared with the calls  
180 recorded during the control trials. (E) Tendency of emitting grouped calls (strobe index) under control  
181 and test conditions in all bats tested (n=10).  
182

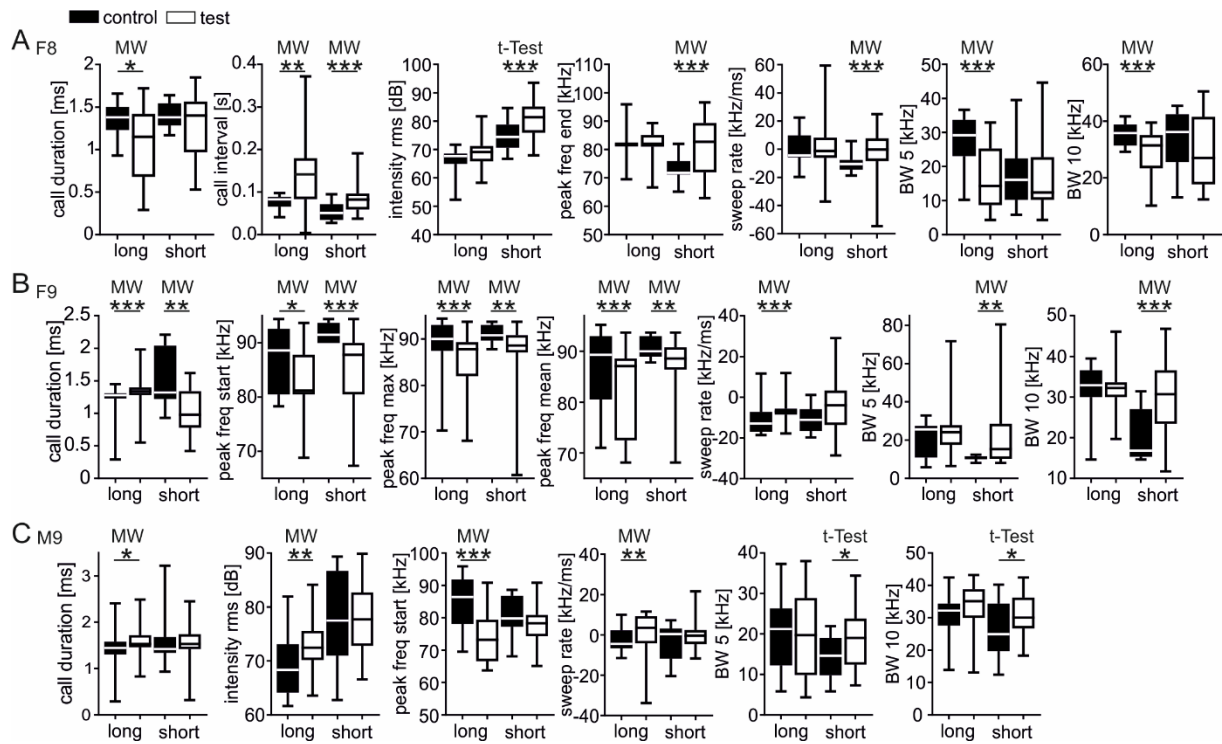

183

### 184 Fig. 3 Individual specific call adaptations in response to playback stimuli

185 (A-C) Boxplots from three individuals (female 8 = 1<sup>st</sup> row; female 9 = 2<sup>nd</sup> row; male 9 = 3<sup>rd</sup> row)

186 showing the call parameters that the bats changed in response to the playback stimulus. Calls recorded

187 under control conditions (absence of playback stimulus) are indicated by black boxplots, while white

188 boxplots represent calls recorded under test conditions (presence of playback stimulus). Echolocation

189 calls that are followed by an echo within 6 ms were grouped into “short delay calls”. Echoes following

190 a call by more than 6 ms were grouped into “long delay calls”. Note that each bat changed different

191 call parameters under test conditions. MW = mann-whitney test; \*  $p < 0.05$ ; \*\*  $p < 0.01$ ; \*\*\*  $p <$

192 0.0001.

193 **Bats vary adaptation strategies across trials and days**

194 To test for behavioral differences across days, eight bats were tested in two consecutive days.  
195 To do a trial-by-trial analysis and to gather enough data points for statistical analysis, we pooled data  
196 from long and short delay calls. During test trials, bats emitted slightly less calls than during the  
197 control trials (median n of calls: 16.5 control and 13 test; Mann-Whitney test:  $p = 0.036$ ). By  
198 comparing the call parameters from F9 across days (Figure 4; Table 3) it becomes clear, that  
199 adjustments of call duration, starting, maximum, and mean peak frequency occurred exclusively on the  
200 first day (Figure 4). During the second test day, F9 mainly changed call intensity, terminal peak  
201 frequency, BW or sweep rate. Adaptation strategies did not only vary across days but also across  
202 subsequent trials during the same test day (Table 3). For example, F9 decreased the call sweep rate in  
203 three (trial 2, 3, and 4) out of five trials of the first test day (Figure 4, bottommost right panel).  
204 Changes of other call parameters varied less dramatically across trials of the same day. In all trials of  
205 the first day, F9 decreased its starting, maximum, and mean peak frequency. When comparing call  
206 adjustments across all trials, it becomes clear that all animals, except F11 for trials 6, 7, 8, and 12,  
207 changed at least one echolocation parameter, when confronted with the playback stimuli (Table 3). For  
208 detailed data from the remaining nine animals see figure S2-S10.

209

210

211

212

213

214

215

216

217 **Table 3 Changes of the call parameters across trials.** + = higher values for test than for  
218 control trials (+ =  $p < 0.05$ ; ++  $p < 0.01$ ; +++  $p < 0.001$ ); - = lower values for test than for control trials  
219 (- =  $p < 0.05$ ; --  $p < 0.01$ ; ---  $p < 0.001$ ); F = female; M = male; l = long delay calls; p f = peak  
220 frequency; s = short delay calls

| Animal ID | Trial (Day) | Intensity | Duration | Interval | Sweep rate | P F start | P F end | P F max | P F mean | BW5 | BW10 |
|-----------|-------------|-----------|----------|----------|------------|-----------|---------|---------|----------|-----|------|
| F8        | 1 (1st)     | ++        | ---      | +++      | -          |           | +++     |         | +        | --  | ---  |
|           | 2 (1st)     |           |          | +        |            |           |         |         |          | -   |      |
|           | 3 (1st)     |           |          | ++       |            |           |         |         |          | --- | ---  |
|           | 4 (2nd)     | +++       |          |          | -          |           | ++      |         |          |     |      |
|           | 5 (2nd)     |           |          |          |            |           |         |         |          |     |      |
|           | 6 (2nd)     |           |          |          | ++         |           |         |         |          |     |      |
| F9        | 1 (1st)     |           |          |          |            | --        |         | -       | --       |     |      |
|           | 2 (1st)     | -         | +        |          | -          | ---       |         | --      | -        |     | +    |
|           | 3 (1st)     |           | +        |          | -          | --        | +       | --      | --       |     |      |
|           | 4 (1st)     |           | ++       |          | -          | ---       |         | ---     | ---      | ++  | ++   |
|           | 5 (1st)     |           | +        |          |            | ---       | --      | --      | --       |     |      |
|           | 6 (2nd)     | +++       |          |          |            |           | +++     |         |          |     |      |
|           | 7 (2nd)     |           |          |          | ++         | ---       |         |         |          | -   | -    |
|           | 8 (2nd)     | --        |          |          | ++         | --        | +++     |         |          |     |      |
| F10       | 1 (1st)     | ++        | +        | +        | ---        |           | +       | -       |          |     |      |
|           | 2 (1st)     | ++        | +++      |          | --         |           |         | ---     | -        |     |      |
|           | 3 (1st)     |           |          |          | --         | --        |         | -       |          | -   |      |
|           | 4 (1st)     | -         |          | +        | --         | -         | +       | --      | -        |     |      |
|           | 5 (1st)     |           |          |          | -          |           | ++      |         |          |     |      |
|           | 6 (1st)     |           |          |          | ++         |           |         |         |          |     |      |
| F11       | 1 (1st)     | +         |          | ---      |            | -         |         | --      |          |     |      |
|           | 2 (1st)     |           | ---      |          |            |           |         |         |          |     |      |
|           | 3 (1st)     | +         |          | --       |            |           | --      | --      | ---      |     |      |
|           | 4 (1st)     |           |          | -        |            |           |         | ---     | -        |     |      |
|           | 5 (2nd)     |           |          | --       |            |           |         |         |          | ++  |      |
|           | 6 (2nd)     |           |          |          |            |           |         |         |          |     |      |
|           | 7 (2nd)     |           |          |          |            |           |         |         |          |     |      |
|           | 8 (2nd)     |           |          |          |            |           |         |         |          |     |      |
|           | 9 (2nd)     | -         |          | --       |            |           |         |         |          | +   |      |
|           | 10 (2nd)    | -         |          |          |            |           |         |         |          |     |      |
|           | 11 (2nd)    |           |          | -        |            |           |         |         |          |     |      |
|           | 12 (2nd)    |           |          |          |            |           |         |         |          |     |      |
| F12       | 1 (1st)     |           | +        | +        |            |           |         |         |          |     |      |
|           | 2 (1st)     |           |          | +++      | --         | -         |         |         |          |     | +    |
|           | 3 (1st)     |           |          |          |            |           | -       |         |          |     |      |
|           | 4 (2nd)     |           |          | ---      | +++        | +++       | --      |         |          | +++ | +++  |
|           | 5 (2nd)     |           |          | ---      | +++        | +         | --      |         |          | ++  | ++   |
|           | 6 (2nd)     |           |          | -        | ++         | +         | --      |         |          | ++  | ++   |
| M9        | 1 (1st)     | ++        | ++       |          | --         | ---       |         |         |          |     |      |
|           | 2 (1st)     |           | +        | ++       |            | --        |         |         |          |     |      |
|           | 3 (1st)     | +++       |          |          |            |           |         | ++      | ++       | --- |      |
|           | 4 (1st)     |           |          |          | --         | ---       |         |         |          |     |      |
|           | 5 (2nd)     |           |          | ---      | --         | ---       |         |         |          | ++  | +++  |
|           | 6 (2nd)     |           |          |          |            |           |         |         |          | ++  | ++   |
|           | 7 (2nd)     |           |          |          |            |           |         | -       | -        | +   | +    |
| M10       | 1 (1st)     |           |          |          |            | -         |         | --      | -        |     |      |
|           | 2 (1st)     |           |          |          |            | ---       |         | ---     |          | -   |      |
|           | 3 (2nd)     |           |          |          |            |           | --      |         |          |     |      |
|           | 4 (2nd)     | +++       | +++      | ++       |            |           |         |         |          |     |      |
|           | 5 (2nd)     |           | +++      | +++      |            |           | -       |         |          |     |      |
|           | 6 (2nd)     |           | +++      | +        | +++        | +++       | --      |         |          |     |      |
| M11       | 1 (1st)     | ---       |          |          |            |           | ---     | --      | ---      |     |      |
|           | 2 (1st)     |           |          |          |            |           | --      |         |          |     | -    |
|           | 3 (1st)     | -         |          |          |            |           |         |         | --       |     |      |
|           | 4 (1st)     | ---       | -        |          |            |           |         | +       |          | -   | -    |
| M12       | 1 (1st)     |           |          |          |            |           | -       |         |          |     |      |
|           | 2 (1st)     |           |          | +++      | +          |           |         |         |          | --- | ---  |
|           | 3 (1st)     |           |          | +        | -          |           |         |         |          |     |      |
|           | 4 (1st)     |           |          |          |            |           |         |         |          |     |      |
|           | 5 (2nd)     |           |          |          | +          |           |         |         |          |     |      |
|           | 6 (2nd)     |           |          |          | ++         |           |         |         |          |     |      |
| M13       | 1 (1st)     | +++       |          | ---      | ---        | +++       |         |         |          |     |      |
|           | 2 (1st)     |           | +        |          | -          | +         |         |         |          |     |      |
|           | 3 (1st)     |           | -        | --       | ---        | +++       |         |         |          |     |      |
|           | 4 (2nd)     |           |          |          | ---        | ---       |         |         | -        | --  |      |
|           | 5 (2nd)     |           |          | --       | ---        | -         |         |         | -        | -   |      |
|           | 6 (2nd)     |           |          |          | -          | ---       |         |         | -        | --  | --   |
|           | 7 (2nd)     | +         | ---      | +++      |            |           | +++     | +       | +        |     | --   |
|           | 8 (2nd)     |           |          |          | --         | -         | ++      |         | -        | -   |      |

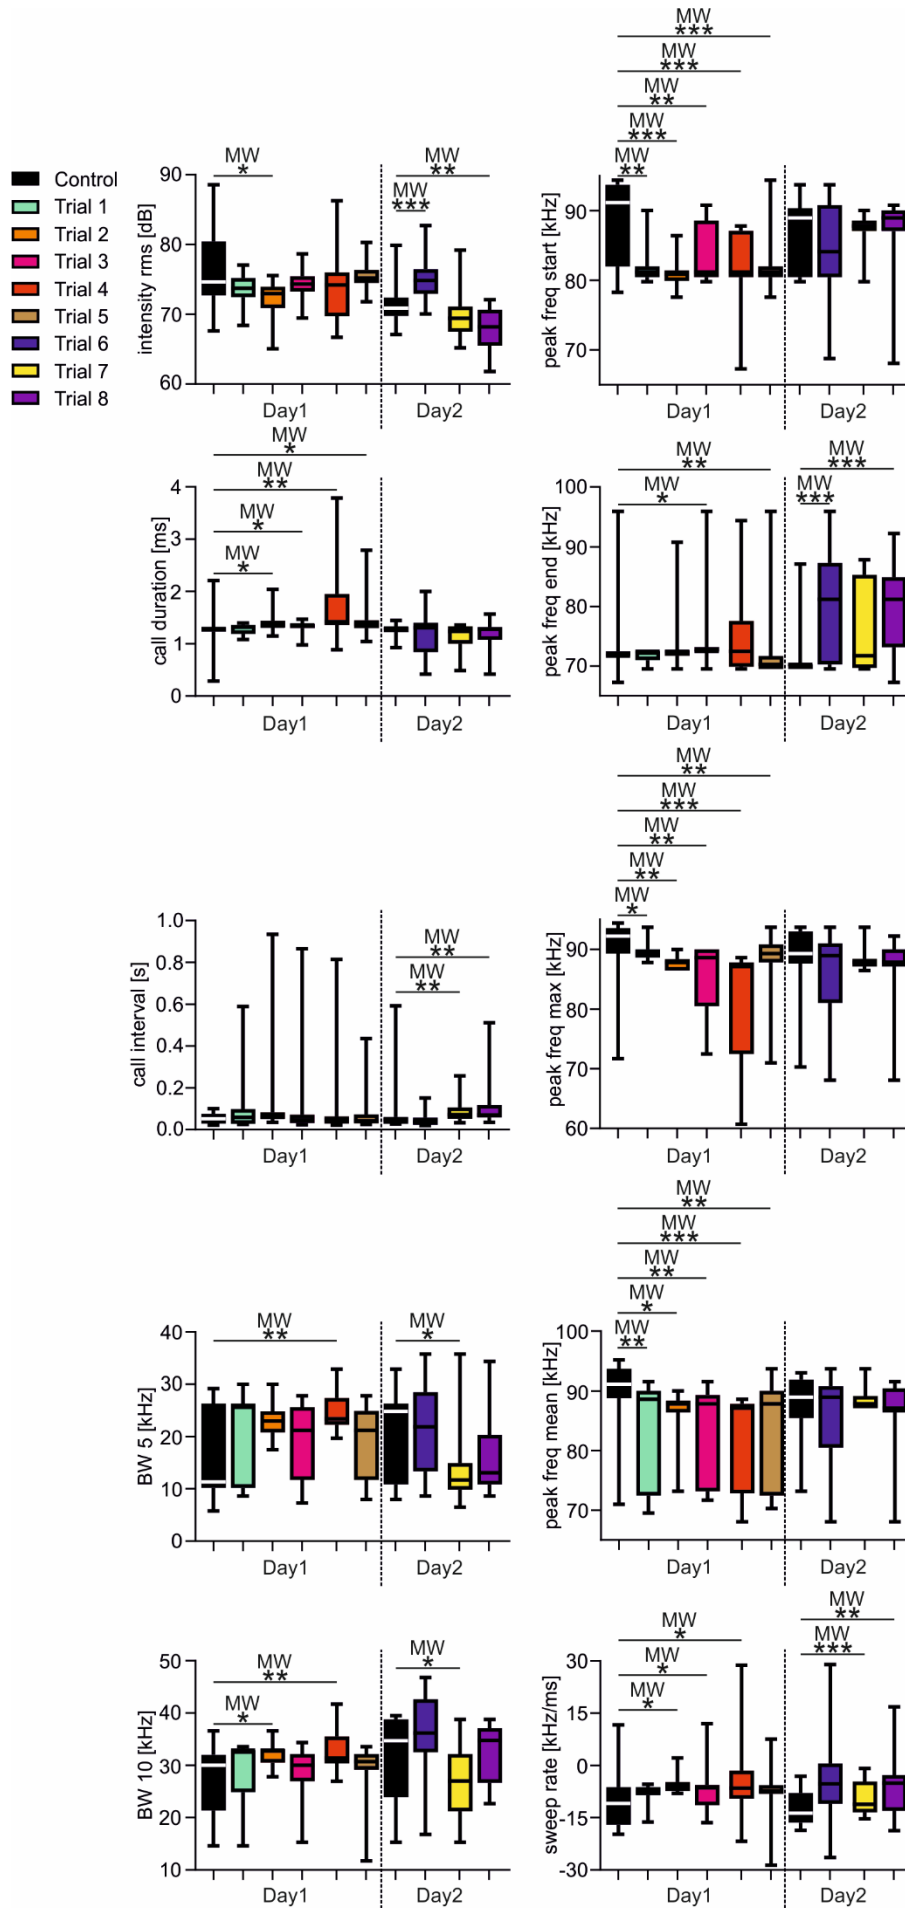

#### 222 **Fig.4 Bats switch adaptation strategies across trials and days**

223 Call parameters are shown as boxplots for each trial (8 test trials and 2 control trials) across two days  
224 from one bat. For visualization purposes, each trial is color coded. Since some call parameters change  
225 in a day dependent manner and independently from the behavioral context (compare intensity values  
226 of the two control trials), it was necessary to compare the test trials with the control trial of the  
227 corresponding day. Note that the bat changes some call parameters only at day 1 (e.g. peak freq start;  
228 call duration; peak freq max) and not at day 2. MW = mann-whitney test; \*  $p < 0.05$ ; \*\*  $p < 0.01$ ; \*\*\*  
229  $p < 0.0001$

230

231

#### 232 **Bats dynamically switch adaptation strategies within trials**

233 After demonstrating that the bats can change adaptation strategies across days and trials, we  
234 were interested in assessing if the bats also vary the strategies within trials. Therefore, we directly  
235 compared the emitted call parameters with the call parameters of the playback stimuli. The upper color  
236 maps in figure 5A and 5B exemplarily show the relative differences between the call parameters and  
237 the playback parameters (note that the playback stimuli consisted in repetitions of the same call) for  
238 two trials coming from two different bats (M9 and F12). The calls are indicated as columns where the  
239 leftmost column represents the call with the longest echo delay and the rightmost column represents  
240 the call with the shortest delay of the trial. Each line represents the relative difference of an emitted  
241 call and the call of the playback stimulus with respect to a specific parameter. The relative difference  
242 was calculated by subtracting the playback parameters from the call parameters. This difference was  
243 normalized against its absolute maximal difference of the considered parameter. So, for each  
244 parameter, there was at least one maximal difference represented by a value of either +1 (red cell =  
245 parameter of the call is higher than the one of the playback) or -1 (blue cell = parameter of the call is  
246 lower than the one of the playback). The darker the red and the darker the blue patches are, the more  
247 positive and negative are the call parameters in comparison to the playback stimulus, respectively.  
248 Looking at the trial from M9, it becomes clear that the bat initially emitted calls with lower starting  
249 peak frequencies (peak start) and call intensities than the playback stimulus. At an echo delay of about



250 3 ms (between the 12<sup>th</sup> and 13<sup>th</sup> call, white dashed line in Fig. 5A), the bat abruptly switched the  
251 strategy and increased the maximum and mean peak frequency and decreased the BW of subsequent  
252 calls. To visualize abrupt changes, we calculated the differences of the parameters of subsequent calls  
253 and plotted the values in the bottom color maps shown in figure 5A and 5B. We defined an abrupt  
254 change when the considered parameter varies by more than 50% between subsequent calls. For  
255 example, according to figure 5A, the terminal (peak end), maximum peak frequency (peak max), and  
256 the sweep rate of call 13, are more than 50% higher than the ones of call 12. This is indicated by red  
257 cells at the corresponding column (white dashed line) in the lower color map of figure 5A.

258 Sudden changes in call design were also visible in other trials, like the one of F12 shown in  
259 figure 5B. Here, the abrupt changes occurred at around 2.5 ms echo delay (white dashed line) by  
260 decreasing the call intensity, starting (peak start), and terminal frequency (peak end) while the  
261 maximum peak frequency (peak max) as well as the call bandwidths (BW 5 and BW10) were abruptly  
262 increased. When comparing all analyzed calls (889 calls from 69 trials and 10 animals), about three  
263 quarters of the calls (74.24%) show sudden changes in at least one call parameter (Figure 5C). About  
264 half of the calls (50.84%) showed abrupt changes in more than one call parameter. We were interested  
265 in knowing if the bats predominantly change particular call parameters or if all parameters were  
266 equally often changed during the trials. The pie chart plotted in figure 5D shows that the bats do not  
267 focus on changing a particular call parameter but they rather change most of the parameters with equal  
268 probability. Only call intensity and call duration were least (7.24%) abruptly changed within the trials.  
269 Abrupt changes were more often detected for spectral parameters.

270 When taking a closer look on the pattern of call changes over subsequent calls (color maps at the  
271 bottom of figure 5B), it becomes obvious that the bats sometimes change the call parameters in an  
272 alternating manner. During the second half of the trial, the bat alternates between high and low  
273 terminal (peak end) and maximum peak frequencies (peak max), indicated by gray and black  
274 arrowheads, respectively. Before analyzing the alternations in more detail, we wondered how often the  
275 bats change a particular call parameter during the trial. The bar plot in figure 5E shows that the bats  
276 changed spectral parameters more often per trial (mean of peak start =  $2.85 \pm 2.39$ ; mean of peak end  
277 =  $2.96 \pm 1.59$ ; mean of peak max =  $2.8 \pm 2.29$ ; mean of BW5 =  $2.84 \pm 1.75$ ; mean of BW10 =  $3.26 \pm$

278 2.39; mean of sweep rate =  $2.51 \pm 1.82$ ) than the call intensity (mean =  $1.91 \pm 1.57$ ) and the call  
279 duration (mean =  $1.73 \pm 1.46$ ) ( $p < 10^{-5}$  Kruskal-Wallis test). Since spectral parameters varied more  
280 often during the trials, alternations occurred with a higher probability in spectral than in non-spectral  
281 (call intensity and call duration) parameters (Figure 5F). Across the spectral parameters, the  
282 probability of alternations did not differ significantly ( $p = 0.91$  Kruskal-Wallis test), indicating that  
283 alternations could equally occur in each of the analyzed call parameters.

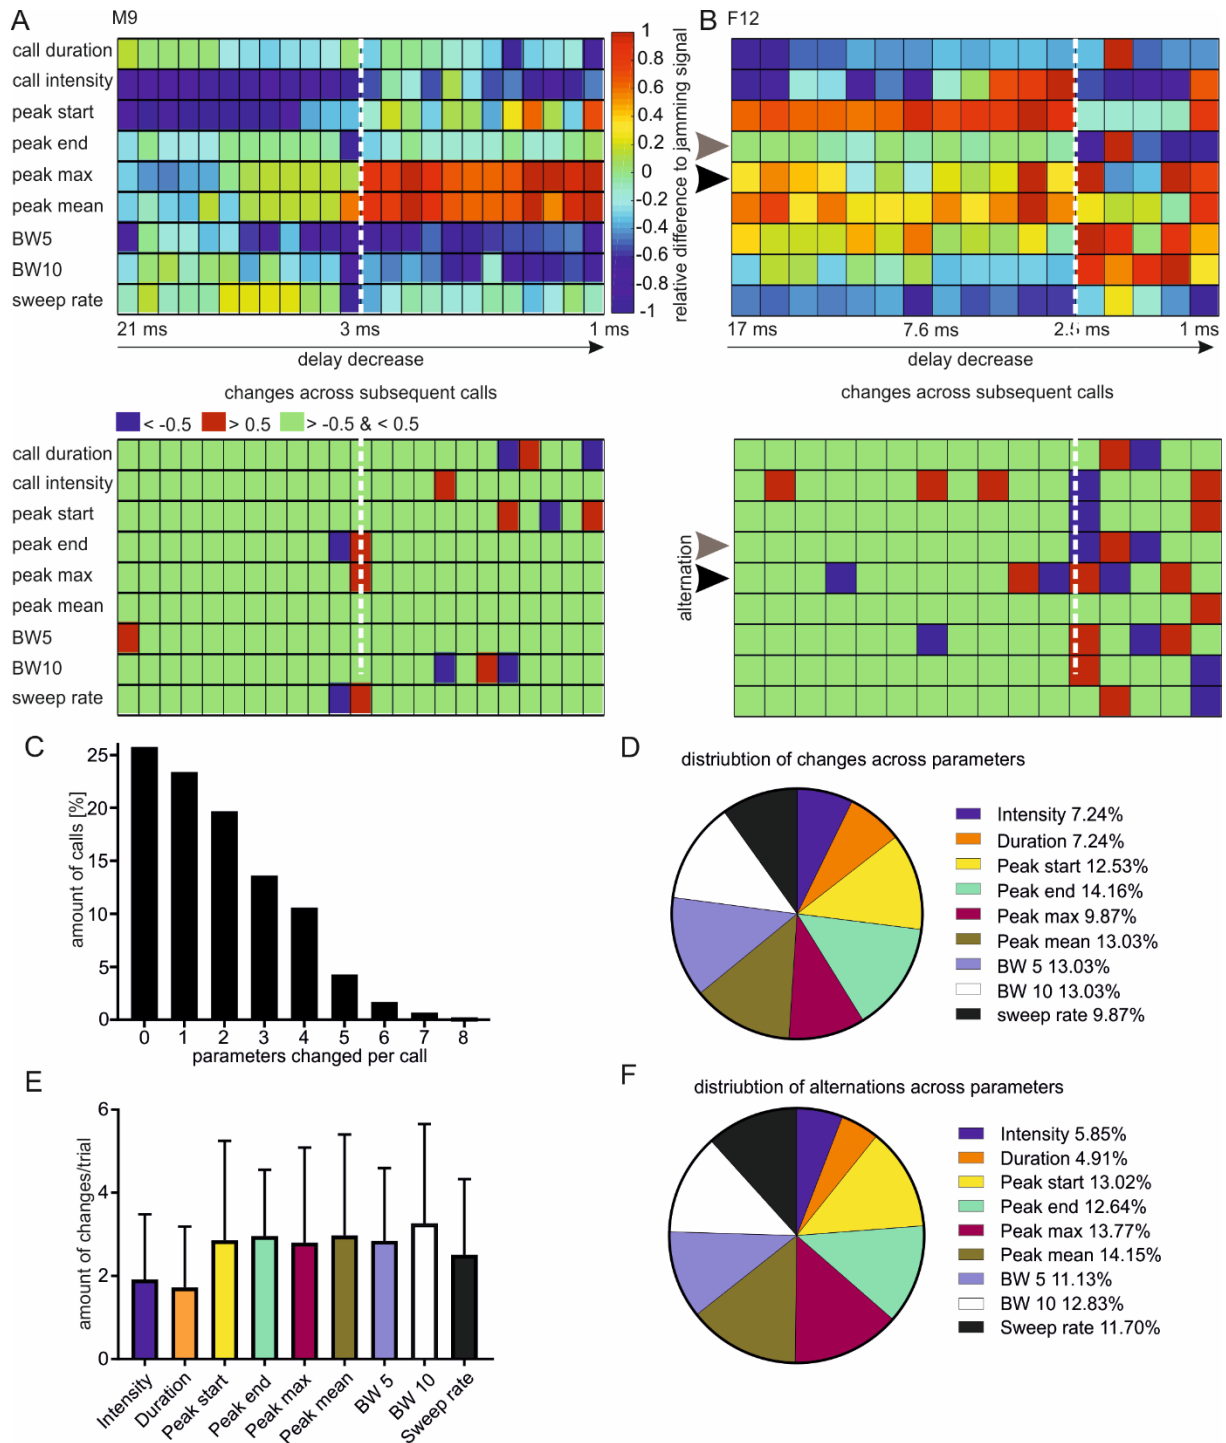

284

285 **Fig.5 Bats switch adaptation strategies within trials**

286 (A-B upper graphs) Color maps from two representative test trials (M9 in (A) and F12 in (B))  
 287 illustrating the differences between the calls and the playback stimuli in a call-wise manner. Along the  
 288 x-axis, the calls are ordered according to their emission order during the trial. The echo delay value  
 289 from some call-echo pairs are indicated in the x-axis. Along the y-axis, normalized call parameter  
 290 differences are color coded. The differences were normalized to their absolute maximum value at the

291 corresponding parameter for the specific trial. The differences of the following call parameters were  
292 considered: call duration, call intensity, peak frequency at the beginning, end and maximum of the  
293 call, mean peak frequency of the call, bandwidth 5 (BW5), bandwidth 10 (BW10), and sweep rate. In  
294 some trials a clear transition of the adaptation strategies can be detected (white vertical dashed lines).  
295 In some cases, the bats alternate call values, as exemplarily shown for F12 for the terminal and  
296 maximum peak frequency indicated by a gray and black arrowhead, respectively. (A-B lower graphs)  
297 Colormaps illustrating abrupt changes of call parameters across subsequent calls. Abrupt changes  
298 occurred when a call parameter between two consecutive calls varied by more than 50% (blue and red  
299 cells represent reductions or increases of the corresponding call parameter). Changes of the call  
300 parameters that are below 50% were not abrupt enough to be defined as a change (green cells).  
301 Transitions between adaptation strategies and alternations between call parameter values can more  
302 easily be seen in the lower colormaps. (C) Histogram showing the amount of parameters that are  
303 abruptly changed per call for all investigated calls ( $n = 889$ ). Note that almost 75% of the calls show at  
304 least one abrupt change. (D) Pie chart illustrating the distribution of abrupt changes over the call  
305 parameters. Abrupt changes did mainly occur in the call spectrum and less often for the intensity or  
306 duration. (E) The mean values of the amount of changes per trial are plotted against the call parameter.  
307 Spectral parameters did vary more often across trials than non-spectral ones (duration and intensity).  
308 (F) Pie chart representing the relative distribution of alternations across different call parameters.

309

310

## 311 **Discussion**

312 The present study characterizes adaptations of the echolocation behavior of the fruit-eating bat *C.*  
313 *perspicillata* when the bat echolocated in the presence of playback stimuli. These playback stimuli  
314 potentially interfered with the bat's biosonar signals making signal extraction for the bat challenging.  
315 Adjustments of the echolocation behavior do not only occur in the presence of acoustic interferer but  
316 also when the bats approach obstacles or transiting between different environments. Thus, it is crucial  
317 to test the influence of acoustic interference on the echolocation behavior under an invariant

318 behavioral context. The pendulum paradigm fulfills these requirements because the behavioral  
319 scenario of an approach flight can be repetitively mimicked.

320 Our results demonstrate that *C. perspicillata* varies different call parameters and the emission  
321 pattern when echolocating in the presence of the playback stimuli. Instead of relying on one adaptation  
322 strategy, the bats use different adaptation strategies (Table 2 and Figure 3). To our surprise, bats could  
323 switch between different strategies across (Table 3, Figure 4) and even within trials (Figure 5). This  
324 makes the adaptation of the echolocation behavior in the presence of acoustic interferers highly  
325 dynamic and unique across different individuals and time points. With this flexibility, the animals  
326 create unique echolocation streams that can be distinguished from interfering signals.

327

### 328 **Coping with signal interference**

329 Signal interference is a problem that every animal and sensory system must cope with. Each  
330 species must extract ethologically relevant stimuli out of the mass of stimuli that it encounters daily.  
331 The more the signal resembles the background, the more challenging is signal extraction. To facilitate  
332 signal processing, animals employ different behavioral adaptations (1, 2) like orienting the sensory  
333 organs towards the signal (34-40). Bats increase head waggles and the inter-pinna distance when  
334 orienting under challenging conditions (33). This putatively improves the localization of the echo  
335 source (33). Additionally, adjustments of the pinna's shape and orientation may increase the  
336 directionality of hearing (41). In the present study, head waggles were avoided by tightly positioning  
337 the bats on a platform in the pendulum mass. Moreover, by adjusting the jamming source close to the  
338 animals' head motor responses may barely facilitate signal extraction under these conditions.

339 For some behaviors - like communication, electrolocation, or echolocation - the animals  
340 produce the signals which allows them to directly control the signal's discriminability from the  
341 background. The latter becomes clear when considering a cocktail party (42). In a noisy environment,  
342 we can focus on our communication partner by carefully listening to him/her and improve the signal-  
343 to-noise ratio by increasing our voice intensity ((22, 43), an adaptation known as the Lombard-effect).  
344 Signal extraction may not only be improved by changing the signal intensity but also by reducing the  
345 spectral overlap between signal and background. This adaptation has originally been described in

346 electrolocating fish (31, 32). When encountering animals whose signal frequencies overlap with the  
347 fish's own signal frequency, the animals shift the signal frequencies away from each other. This  
348 behavior has been circumscribed as jamming avoidance response (JAR) and it reduces the signal  
349 interference with signals coming from conspecifics. JAR has also been demonstrated in different bat  
350 species ((7, 11-14, 16-20) and present study). However, in contrast to weakly electric fish - that try to  
351 occupy an individual specific frequency band - bats dynamically adjust their call spectra in various  
352 situations. Bats adjust their calls when approaching an obstacle or when transiting between different  
353 environments (24, 26, 28, 44-54). Since frequency adjustments occur frequently and under various  
354 conditions, an adaptation that purely focuses on a JAR may not be efficient enough to orient collision-  
355 free in the presence of signal interferer. Note that some studies reported that bats do not shift their  
356 frequency in response to acoustic interference (55) or that the frequency shifts are purely correlated  
357 with the object distance (15). Since we compared echolocation calls that were emitted roughly at  
358 similar distances between the bat and the object, we can exclude that the frequency shifts, presented in  
359 our study reflect distance dependent changes of the call design.

360

### 361 **Repertoire of behavioral adaptations in response to interfering signals and their possible neural** 362 **correlates**

363 Fine adjustments of the call design and/or emission pattern may sufficiently simplify the  
364 discrimination between relevant biosonar signals and the playback stimulus. For example, adjustments  
365 in call bandwidth could minimize acoustic interference, since decreasing the bandwidth restricts the  
366 population of neurons that process echo information. On the contrary, increasing the call bandwidth  
367 activates auditory neurons that are not responding to the playback stimulus. Thus, neurons that do not  
368 respond to the playback stimulus could "selectively" process frequencies that are unique to the  
369 biosonar signals but are not present in the interferers.

370 Bats also increase the signal-to-noise ratio by increasing call intensity (18-22, 24, 56).  
371 Unexpectedly, in the present study, sometimes the bats decreased their call intensity when they  
372 echolocated in the presence of interfering signals. Although, this decreases the signal-to-noise ratio, it  
373 could be still useful from a neuronal perspective. Many auditory neurons respond more strongly and

374 selectively to low than to high sound levels resulting into non-monotonic intensity rate functions (57-  
375 61). This makes some neurons highly selective to faint biosonar signals while being insensitive to  
376 intense background stimuli.

377         Some studies reported that bats lengthen their calls when flying in noisy environments (20, 21,  
378 23, 56, 62). In the present study, we observed that some bats lengthened, and others shortened their  
379 calls. Both adaptations putatively minimize acoustic interference. Shortening the calls decreases the  
380 chance of a temporal overlap between signal and background. Lengthening the calls increases the risk  
381 of temporal overlap but it could still be useful if only a small portion of the echo needs to be detected  
382 to gain enough spatial information.

383         Not only the call design, but also the emission pattern is adjusted to reduce or even avoid  
384 signal interference. Some bat species alternate between two call designs that differ in the frequency  
385 spectrum (25-27). This adaptation allows a higher call rate by emitting a pair of calls before receiving  
386 an echo from the first call of the pair (63, 64). The arising echoes differ in their frequency spectra  
387 which makes their discrimination feasible (28). Alternation of spectral call parameters have also been  
388 observed in the present study. However, these alternations occurred occasionally and not throughout  
389 the entire trial. Thus, the behavioral importance of alternating call parameters in *C. perspicillata* needs  
390 to be further assessed.

391         Some bats reduce their call rate (29) and temporally even cease to emit calls (30). This  
392 adaptation may be beneficial if the bats eavesdrop on echolocation signals from conspecifics and use  
393 the signals for orientation (65-68). Although, *C. perspicillata* emitted less calls during the test than  
394 during the control trials, we cannot assess with the pendulum paradigm if the bats eavesdropped on the  
395 echolocation signals coming from the speaker.

396         Lastly, some individuals increase their rate of grouping calls when orienting in noisy  
397 environments ((22, 26, 69, 70) and present study). Grouping the calls may improve echolocation  
398 performance in different ways. First, a defined periodicity of echo arrivals allows echo identification  
399 based on prediction (8, 33, 44, 49). Second, grouping the calls could create an information redundancy  
400 allowing the bats to rely only on a small portion of the call group (69).

401

402 **Bats show different combinations of adaptations when echolocating in the presence of acoustic**  
403 **interferer**

404 Instead of relying on one of the behavioral adaptations, our results indicate that bats have a  
405 toolkit of different combinable adaptations to potentially minimize acoustic interference (19, 22). The  
406 dynamics and variability of the strategies are important factors for explaining the high diversity of  
407 behavioral adaptations reported in former studies. We must keep in mind that the discriminability of a  
408 signal from the background is dictated by the difference of the physical parameters between the signal  
409 and the background. Hereby, it is unimportant which physical parameter is adjusted, as long as the  
410 signal has its own physical identity providing a high discriminability from the background. For call-  
411 echo assignment, it has been discussed that bats keep an “internal copy” of their broadcasted calls and  
412 compare the copy with the received echoes (4). This idea goes in line with behavioral results showing  
413 that correct call-echo assignment is decreased when spectro-temporal properties of the echo are  
414 manipulated (71-73) or when echoes are replaced by noise bursts (74). Because of missing behavioral  
415 data in *C. perspicillata*, it remains speculative to what extent the echolocation calls need to differ from  
416 the playback stimuli so that bats can still extract the signals. When comparing different call parameters  
417 against the playback stimuli used in the present study, it becomes clear that some echolocation calls  
418 emitted during the trials differed pronouncedly from the playback stimuli (Figure S11). Although  
419 having no detection thresholds from *C. perspicillata*, there are some behavioral and  
420 electrophysiological results from other bat species that use similar call designs as *C. perspicillata*  
421 (*Eptesicus fuscus*: (75, 76); *Tadarida brasiliensis*: (77), *Antrozous pallidus* (78)). Based on these  
422 studies, we may speculate that *C. perspicillata* can extract signals that differ for one of the following  
423 parameters by more than 10 dB in intensity, by at least 0.7 ms in duration, by more than 5 kHz in the  
424 peak frequency, by more than 12 kHz in the bandwidth, and by more than 6 kHz in the sweep rate  
425 from the playback stimuli. By considering these thresholds, *C. perspicillata* may be able to extract  
426 about 94% of the calls from the playback stimuli. Only 5.96% of the calls did not reach our  
427 hypothetical detection thresholds for any of the investigated call parameters. Note that the emission  
428 pattern could not be considered for a call-by-call analysis. Thus, it is still probable that the remaining  
429 5.96% of the call’s echoes could be detected by the fact of anticipation of the echo pattern. This could



430 be accomplished by grouping the calls (Figure 2A, (69)). In the present study, four out of ten bats  
431 increased the tendency of grouping the calls (Figure 3D). Electrophysiologically, we showed that  
432 auditory neurons of the midbrain and the cortex of *C. perspicillata* can still extract relevant spatial  
433 information when the bats are stimulated by high call rates can still be processed by (69, 79-81).

434 In summary, our results emphasize that bats may profit not only from one but rather from  
435 many behavioral adaptations to reduce the risk of signal interference. The bats dynamically adjust and  
436 switch their adaptation strategies across subsequent calls. Future studies investigating jamming  
437 avoidance behavior should carefully take into account the vast repertoire of behavioral adaptations that  
438 animals may use to escape sensory interference.

439

## 440 **Materials and methods**

### 441 **Animals**

442 Experiments were conducted in 10 bats (5 females and 5 males) of the species *Carollia perspicillata*.  
443 The bats were bred and kept in a colony at the Institute for Cell Biology and Neuroscience (Goethe-  
444 University Frankfurt). The experiments comply with all current German laws on animal  
445 experimentation and they are in accordance with the Declaration of Helsinki. All experimental  
446 protocols were approved by the Regierungspräsidium Darmstadt (experimental permit # #FU-1126).

447

### 448 **Pendulum paradigm and audio recordings**

449 For controlling the behavioral context, the bats were positioned in the mass of a pendulum and they  
450 were repetitively swung towards an acrylic glass wall (50 × 150 cm, Figure 1A) (80-83). The smooth  
451 surface of the acrylic glass wall ensured call reflection without producing prominent spectral notches  
452 in the echoes. During the swing, the bats emitted echolocation sequences that were recorded, together  
453 with their echoes, by an ultrasound sensitive microphone (CM16/CMPA, Avisoft Bioacoustics,  
454 Germany). The microphone had a sensitivity of 50 mV/Pa and an input-referred self-noise level of 18  
455 dB SPL, as reported by the manufacturer. The frequency response curve was flat ( $\pm 3$  dB, as specified  
456 by the manufacturer) in the range from 30-130 kHz. The microphone travelled with the mass of the  
457 pendulum and it was medially positioned above the bat's head. The membrane of the microphone was

458 adjusted as closely as possible to the bat's ears (~ 4 cm). The microphone was connected to a sound  
459 acquisition system (Ultra Sound Gate 116Hm mobile recording interface, + Recorder Software,  
460 Avisoft Bioacoustics, Germany). To test the influence of acoustic interference on the echolocation  
461 behavior, bats were swung in the pendulum while they were acoustically stimulated with a playback  
462 stimulus (see below). We compared the echolocation behavior recorded in the absence of playback  
463 stimuli (control trials) with the one shown in the presence of playback (test trials). Our reasoning was  
464 that since the behavioral context was invariant during control and test trials, except for the occurrence  
465 of the playback stimulus, we could correlate adaptations in the echolocation behavior with the  
466 presence/absence of the playback.

467 Initially, the bats were tested in a control trial followed by test trials where an echolocation call  
468 recorded during the forward swing of the control trial was selected to construct an individual-specific  
469 playback stimulus. The playback stimulus consists of an echolocation call that was presented as  
470 quartets with a call interval of 25 ms and the quartets were repeated with an inter-quartet interval  
471 between 130 and 150 ms. The intensity of the playback stimulus was adjusted to rms values (of single  
472 calls) between 80 and 90 dB SPL for all animals. We reasoned that using an echolocation call of the  
473 tested animal as playback stimulus could be the most effective way of achieving acoustic jamming.  
474 The latter is supported by the fact that subtle inter-individual differences in call design could be  
475 detected by the animals, which reduces signal interference (84). During test trials, the playback  
476 stimulus was presented from an ultrasound speaker (MK 103.1 Microtech Gefell Microphone Capsule  
477 used as speaker) that was flat in the range from 5 to 120 kHz (mean level in calibration curve  $84 \pm 3$   
478 dB SPL, the speaker's protection cap was replaced with a self-made cap to prevent energy loss at high  
479 frequencies). The speaker was placed pointing towards the bat's head at a distance of 20 cm. Eight out  
480 of ten bats were tested on two consecutive days, but with different, day-specific, playback stimuli. The  
481 latter should exclude that changes of the call design that may occur across days might bias our  
482 analysis. An overview of the call parameters used for constructing playback stimuli is shown in Table  
483 1.

484

485 **Analyzed echolocation parameters**

486 Since the time pattern of the playback stimuli was kept constant, we could discriminate between  
487 biosonar signals emitted by the bat and the playback stimuli. The call emissions were manually tagged  
488 in the software Avisoft SAS Lab Pro (Avisoft Bioacoustics, Germany). To characterize the  
489 echolocation calls, different call parameters were measured in Avisoft SAS Lab Pro. The present study  
490 focused on call level, call duration, peak frequency at different call time points (start, end, maximum  
491 amplitude, and mean), bandwidth 5 (BW5), BW10, and sweep rate (Figure 1B). Regarding the call  
492 spectra, we considered only the peak frequencies (frequencies with the maximum energy at particular  
493 time points of the call or on average of a call) because the peak frequencies might be the most salient  
494 spectral information of the echo that would suffer least from reflective attenuation. BW5 and BW10  
495 represents frequency ranges at 5 and 10 dB below the mean peak frequency (Figure 1B). The sweep  
496 rate was calculated by subtracting the initial peak frequency from the terminal peak frequency and by  
497 dividing by the call duration.

498 The call emission pattern was characterized by measuring the call intervals and the tendency  
499 of grouping the calls. Analysis of the call groups was done using custom-written scripts in Matlab  
500 2014 (MathWorks, USA). Call groups were defined according to two criteria (47, 69). An “island  
501 criterion” defines call groups that are isolated in time. An isolation was fulfilled as soon as the  
502 preceding and following call intervals of a call group were 20% longer than the call intervals within  
503 call groups. If the “island criterion” is fulfilled, a second criterion, the so called “stability criterion”,  
504 defines the size of the call groups indicated by the number of calls belonging to a group. The stability  
505 criterion is fulfilled if the call intervals within call groups are stable with a 5% tolerance. Next, we  
506 calculated a strobe index for each animal and each condition (control and test trial). The strobe index  
507 represents the relative amount of calls that were emitted as groups.

508

## 509 **Statistics**

510 For statistical analysis, we used the software GraphPad Prism 7 (GraphPad Software, USA; \*  $p < 0.05$ ;  
511 \*\*  $p < 0.01$ ; \*\*\*  $p < 0.0001$ ). Since the echolocation behavior in two conditions (control versus test  
512 trials) were compared to each other, statistical tests were either based on nonparametric Mann-

513 Whitney tests (MW; in case of non-Gaussian distribution) or on parametric t-Tests (in case of  
514 Gaussian distribution).

515 **References**

516

- 517 1. Ulanovsky N, Moss CF. What the bat's voice tells the bat's brain. Proc Natl Acad Sci USA.  
518 2008;105(25):8491-8.
- 519 2. Corcoran AJ, Moss CF. Sensing in a noisy world: lessons from auditory specialists,  
520 echolocating bats. J Exp Biol. 2017;220(24):4554-66.
- 521 3. Moss CF, Surlykke A. Probing the natural scene by echolocation in bats. Front Behav  
522 Neurosci. 2010;4.
- 523 4. Simmons JA. Bats use a neuronally implemented computational acoustic model to form sonar  
524 images. Curr Opin Neurobiol. 2012;22(2):311-9.
- 525 5. Kössl M, Hechavarría JC, Voss C, Macías S, Mora EC, Vater M. Neural maps for target range  
526 in the auditory cortex of echolocating bats. Curr Opin Neurobiol. 2014;24:68-75.
- 527 6. Wohlgenuth MJ, Luo J, Moss CF. Three-dimensional auditory localization in the  
528 echolocating bat. Curr Opin Neurobiol. 2016;41:78-86.
- 529 7. Ulanovsky N, Fenton MB, Tsoar A, Korine C. Dynamics of jamming avoidance in  
530 echolocating bats. P R Soc B. 2004;271(1547):1467-75.
- 531 8. Suga N, O'Neill WE, Kujirai K, Manabe T. Specificity of Combination-Sensitive Neurons for  
532 Processing of Complex Biosonar Signals in Auditory-Cortex of the Mustached Bat. J Neurophysiol.  
533 1983;49(6):1573-626.
- 534 9. Parsons KN, Jones G, Greenaway F. Swarming activity of temperate zone microchiropteran  
535 bats: effects of season, time of night and weather conditions. J Zool. 2003;261:257-64.
- 536 10. Levin E, Roll U, Dolev A, Yom-Tov Y, Kronfeld-Shcor N. Bats of a Gender Flock Together:  
537 Sexual Segregation in a Subtropical Bat. Plos One. 2013;8(2).
- 538 11. Habersetzer J. Adaptive Echolocation Sounds in the Bat *Rhinopoma-Hardwickei* - a Field-  
539 Study. J Comp Physiol. 1981;144(4):559-66.
- 540 12. Miller LA, Degn HJ. The Acoustic Behavior of 4 Species of Vespertilionid Bats Studied in the  
541 Field. Journal of Comparative Physiology. 1981;142(1):67-74.
- 542 13. Ratchliffe JM, ter Hofstede HM, Avila-Flores R, Fenton MB, McCracken GF, Biscardi S, et al.  
543 Conspecifics influence call design in the Brazilian free-tailed bat, *Tadarida brasiliensis*. Canadian  
544 Journal of Zoology-Revue Canadienne De Zoologie. 2004;82(6):966-71.
- 545 14. Ibanez C, Juste J, Lopez-Wilchis R, Nunez-Garduno A. Habitat variation and jamming  
546 avoidance in echolocation calls of the sac-winged bat (*Balantiopteryx plicata*). J Mammal.  
547 2004;85(1):38-42.
- 548 15. Cvikel N, Levin E, Hurme E, Borissov I, Boonman A, Amichai E, et al. On-board recordings  
549 reveal no jamming avoidance in wild bats. P R Soc B. 2015;282(1798).
- 550 16. Gillam EH, McCracken GF. Variability in the echolocation of *Tadarida brasiliensis*: effects of  
551 geography and local acoustic environment. Anim Behav. 2007;74:277-86.
- 552 17. Gillam EH, Ulanovsky N, McCracken GF. Rapid jamming avoidance in biosonar. Proc Biol  
553 Sci. 2007;274(1610):651-60.
- 554 18. Takahashi E, Hyomoto K, Riquimaroux H, Watanabe Y, Ohta T, Hiryu S. Adaptive changes  
555 in echolocation sounds by *Pipistrellus abramus* in response to artificial jamming sounds. J Exp Biol.  
556 2014;217(16):2885-91.
- 557 19. Hage SR, Jiang TL, Berquist SW, Feng J, Metzner W. Ambient noise induces independent  
558 shifts in call frequency and amplitude within the Lombard effect in echolocating bats. P Natl Acad Sci  
559 USA. 2013;110(10):4063-8.
- 560 20. Tressler J, Smotherman MS. Context-dependent effects of noise on echolocation pulse  
561 characteristics in free-tailed bats. J Comp Physiol A. 2009;195(10):923-34.
- 562 21. Amichai E, Blumrosen G, Yovel Y. Calling louder and longer: how bats use biosonar under  
563 severe acoustic interference from other bats. P R Soc B. 2015;282(1821).
- 564 22. Luo JH, Goerlitz HR, Brumm H, Wiegrebe L. Linking the sender to the receiver: vocal  
565 adjustments by bats to maintain signal detection in noise. Sci Rep-Uk. 2015;5.
- 566 23. Simmons JA, Fenton MB, Ofarrell MJ. Echolocation and Pursuit of Prey by Bats. Science.  
567 1979;203(4375):16-21.

- 568 24. Simmons JA, Lavender WA, Lavender BA, Childs JE, Hulebak K, Rigden MR, et al.  
569 Echolocation by Free-Tailed Bats (*Tadarida*). *Journal of Comparative Physiology*. 1978;125(4):291-9.
- 570 25. Obrist MK. Flexible Bat Echolocation - the Influence of Individual, Habitat and Conspecifics  
571 on Sonar Signal-Design. *Behav Ecol Sociobiol*. 1995;36(3):207-19.
- 572 26. Roverud RC, Grinnell AD. Discrimination Performance and Echolocation Signal Integration  
573 Requirements for Target Detection and Distance Determination in the CF FM Bat, *Noctilio-*  
574 *Albiventris*. *J Comp Physiol A*. 1985;156(4):447-56.
- 575 27. Roverud RC, Grinnell AD. Echolocation Sound Features Processed to Provide Distance  
576 Information in the Cf Fm Bat, *Noctilio-Albiventris* - Evidence for a Gated Time Window Utilizing  
577 Both Cf and Fm Components. *J Comp Physiol A*. 1985;156(4):457-69.
- 578 28. Hiryu S, Bates ME, Simmons JA, Riquimaroux H. FM echolocating bats shift frequencies to  
579 avoid broadcast-echo ambiguity in clutter. *Proc Natl Acad Sci USA*. 2010;107(15):7048-53.
- 580 29. Adams AM, Davis K, Smotherman M. Suppression of emission rates improves sonar  
581 performance by flying bats. *Sci Rep-Uk*. 2017;7.
- 582 30. Jarvis J, Jackson W, Smotherman M. Groups of bats improve sonar efficiency through mutual  
583 suppression of pulse emissions. *Frontiers in Physiology*. 2013;4.
- 584 31. Watanabe A, Takeda K. The Change of Discharge Frequency by A.C. Stimulus in a Weak  
585 Electric Fish. *J Exp Biol*. 1963;40(1):57-+.
- 586 32. Bullock TH, Hamstra RH, Scheich H. Jamming Avoidance Response of High-Frequency  
587 Electric Fish .1. General Features. *Journal of Comparative Physiology*. 1972;77(1):1-22.
- 588 33. Wohlgemuth MJ, Kothari NB, Moss CF. Action Enhances Acoustic Cues for 3-D Target  
589 Localization by Echolocating Bats. *Plos Biology*. 2016;14(9).
- 590 34. Towal RB, Hartmann MJ. Right-left asymmetries in the whisking behavior of rats anticipate  
591 head movements. *J Neurosci*. 2006;26(34):8838-46.
- 592 35. Ganguly K, Kleinfeld D. Goal-directed whisking increases phase-locking between vibrissa  
593 movement and electrical activity in primary sensory cortex in rat. *P Natl Acad Sci USA*.  
594 2004;101(33):12348-53.
- 595 36. Land MF. Eye movements of vertebrates and their relation to eye form and function. *Journal*  
596 *of Comparative Physiology a-Neuroethology Sensory Neural and Behavioral Physiology*.  
597 2015;201(2):195-214.
- 598 37. Tarsitano MS, Andrew R. Scanning and route selection in the jumping spider *Portia labiata*.  
599 *Anim Behav*. 1999;58:255-65.
- 600 38. Schroeder CE, Wilson DA, Radman T, Scharfman H, Lakatos P. Dynamics of Active Sensing  
601 and perceptual selection. *Curr Opin Neurobiol*. 2010;20(2):172-6.
- 602 39. Ribak G, Egge AR, Swallow JG. Saccadic head rotations during walking in the stalk-eyed fly  
603 (*Cyrtodiopsis dalmanni*). *P R Soc B*. 2009;276(1662):1643-9.
- 604 40. Eckmeier D, Geurten BRH, Kress D, Mertes M, Kern R, Egelhaaf M, et al. Gaze Strategy in  
605 the Free Flying Zebra Finch (*Taeniopygia guttata*). *Plos One*. 2008;3(12).
- 606 41. Gao L, Balakrishnan S, He WK, Yan Z, Müller R. Ear Deformations Give Bats a Physical  
607 Mechanism for Fast Adaptation of Ultrasonic Beam Patterns. *Phys Rev Lett*. 2011;107(21).
- 608 42. Bee MA, Micheyl C. The cocktail party problem: What is it? How can it be solved? And why  
609 should animal behaviorists study it? *Journal of Comparative Psychology*. 2008;122(3):235-51.
- 610 43. Brumm H, Zollinger SA. The evolution of the Lombard effect: 100 years of psychoacoustic  
611 research. *Behaviour*. 2011;148(11-13):1173-98.
- 612 44. Petrites AE, Eng OS, Mowlds DS, Simmons JA, DeLong CM. Interpulse interval modulation  
613 by echolocating big brown bats (*Eptesicus fuscus*) in different densities of obstacle clutter. *J Comp*  
614 *Physiol A*. 2009;195(6):603-17.
- 615 45. Barchi JR, Knowles JM, Simmons JA. Spatial memory and stereotypy of flight paths by big  
616 brown bats in cluttered surroundings. *J Exp Biol*. 2013;216(6):1053-63.
- 617 46. Falk B, Jakobsen L, Surlykke A, Moss CF. Bats coordinate sonar and flight behavior as they  
618 forage in open and cluttered environments. *J Exp Biol*. 2014;217(24):4356-64.
- 619 47. Kothari NB, Wohlgemuth MJ, Hulgard K, Surlykke A, Moss CF. Timing matters: sonar call  
620 groups facilitate target localization in bats. *Frontiers in Physiology*. 2014;5.
- 621 48. Knowles JM, Barchi JR, Gaudette JE, Simmons JA. Effective biosonar echo-to-clutter  
622 rejection ratio in a complex dynamic scene. *J Acoust Soc Am*. 2015;138(2):1090-101.

- 623 49. Wheeler AR, Fulton KA, Gaudette JE, Simmons RA, Matsuo I, Simmons JA. Echolocating  
624 Big Brown Bats, *Eptesicus fuscus*, Modulate Pulse Intervals to Overcome Range Ambiguity in  
625 Cluttered Surroundings. *Frontiers in Behavioral Neuroscience*. 2016;10.
- 626 50. Surlykke A, Moss CF. Echolocation behavior of big brown bats, *Eptesicus fuscus*, in the field  
627 and the laboratory. *J Acoust Soc Am*. 2000;108(5):2419-29.
- 628 51. Griffin DR. Bat Sounds under Natural Conditions, with Evidence for Echolocation of Insect  
629 Prey. *J Exp Zool*. 1953;123(3):435-65.
- 630 52. Schnitzler HU, Kalko E, Miller L, Surlykke A. The Echolocation and Hunting Behavior of the  
631 Bat, *Pipistrellus-Kuhli*. *J Comp Physiol A*. 1987;161(2):267-74.
- 632 53. Kalko EKV. Insect Pursuit, Prey Capture and Echolocation in Pipistrelle Bats  
633 (Microchiroptera). *Anim Behav*. 1995;50:861-80.
- 634 54. Kalko EKV, Schnitzler HU. The Echolocation and Hunting Behavior of Daubenton Bat,  
635 *Myotis-Daubentoni*. *Behav Ecol Sociobiol*. 1989;24(4):225-38.
- 636 55. Götze S, Koblitz JC, Denzinger A, Schnitzler HU. No evidence for spectral jamming  
637 avoidance in echolocation behavior of foraging pipistrelle bats. *Sci Rep-Uk*. 2016;6.
- 638 56. Simmons JA. Noise interference with echo delay discrimination in bat biosonar. *J Acoust Soc*  
639 *Am*. 2017;142(5):2942-52.
- 640 57. Hechavarría JC, Kössl M. Footprints of inhibition in the response of cortical delay-tuned  
641 neurons of bats. *J Neurophysiol*. 2014;111(8):1703-16.
- 642 58. Suga N, Manabe T. Neural Basis of Amplitude-Spectrum Representation in Auditory-Cortex  
643 of the Mustached Bat. *J Neurophysiol*. 1982;47(2):225-55.
- 644 59. Barone P, Clarey JC, Irons WA, Imig TJ. Cortical synthesis of azimuth-sensitive single-unit  
645 responses with nonmonotonic level tuning: A thalamocortical comparison in the cat. *J Neurophysiol*.  
646 1996;75(3):1206-20.
- 647 60. Park TJ, Pollak GD. Gaba Shapes a Topographic Organization of Response Latency in the  
648 Moustache Bats Inferior Colliculus. *J Neurosci*. 1993;13(12):5172-87.
- 649 61. Yang LC, Pollak GD, Resler C. Gabaergic Circuits Sharpen Tuning Curves and Modify  
650 Response Properties in the Moustache Bat Inferior Colliculus. *J Neurophysiol*. 1992;68(5):1760-74.
- 651 62. Simmons JA, Howell DJ, Suga N. Information-Content of Bat Sonar Echoes. *Am Sci*.  
652 1975;63(2):204-15.
- 653 63. Behr O, von Helversen O. Bat serenades - complex courtship songs of the sac-winged bat  
654 (*Saccopteryx bilineata*). *Behav Ecol Sociobiol*. 2004;56(2):106-15.
- 655 64. Jung K, Kalko EKV, von Helversen O. Echolocation calls in Central American emballonurid  
656 bats: signal design and call frequency alternation. *J Zool*. 2007;272(2):125-37.
- 657 65. Barclay RMR. Interindividual Use of Echolocation Calls - Eavesdropping by Bats. *Behav*  
658 *Ecol Sociobiol*. 1982;10(4):271-5.
- 659 66. Leonard ML, Fenton MB. Echolocation Calls of *Euderma-Maculatum* (Vespertilionidae) -  
660 Use in Orientation and Communication. *J Mammal*. 1984;65(1):122-6.
- 661 67. Chiu C, Xian W, Moss CF. Flying in silence: Echolocating bats cease vocalizing to avoid  
662 sonar jamming. *P Natl Acad Sci USA*. 2008;105(35):13116-21.
- 663 68. Lin Y, Abaid N. Modeling perspectives on echolocation strategies inspired by bats flying in  
664 groups. *Journal of Theoretical Biology*. 2015;387:46-53.
- 665 69. Beetz MJ, García-Rosales F, Kössl M, Hechavarría JC. Robustness of cortical and subcortical  
666 processing in the presence of natural masking sounds. *Sci Rep*. 2018.
- 667 70. Beetz MJ, Kössl M., Hechavarría JC Adaptations in the call emission pattern of frugivorous  
668 bats when orienting under challenging conditions. *J Comp Physiol A*. *in press*.
- 669 71. Masters WM, Jacobs SC. Target Detection and Range Resolution by the Big Brown Bat  
670 (*Eptesicus-Fuscus*) Using Normal and Time-Reversed Model Echoes. *J Comp Physiol A*.  
671 1989;166(1):65-73.
- 672 72. Masters WM, Raver KAS. The degradation of distance discrimination in big brown bats  
673 (*Eptesicus fuscus*) caused by different interference signals. *J Comp Physiol A*. 1996;179(5):703-13.
- 674 73. Masters WM, Raver KAS. Range discrimination by big brown bats (*Eptesicus fuscus*) using  
675 altered model echoes: Implications for signal processing. *J Acoust Soc Am*. 2000;107(1):625-37.
- 676 74. Surlykke A. Target Ranging and the Role of Time-Frequency Structure of Synthetic Echoes in  
677 Big Brown Bats, *Eptesicus-Fuscus*. *J Comp Physiol A*. 1992;170(1):83-92.

- 678 75. Chiu C, Xian W, Moss CF. Adaptive echolocation behavior in bats for the analysis of auditory  
679 scenes. *J Exp Biol.* 2009;212(9):1392-404.
- 680 76. von Stebut B, Schmidt S. Frequency discrimination threshold at search call frequencies in the  
681 echolocating bat, *Eptesicus fuscus*. *J Comp Physiol A.* 2001;187(4):287-91.
- 682 77. Bartsch E, Schmidt S. Psychophysical Frequency-Modulation Thresholds in a Fm-Bat,  
683 *Tadarida-Brasiliensis*. *Hearing Res.* 1993;67(1-2):128-38.
- 684 78. Fuzessery ZM. Response Selectivity for Multiple Dimensions of Frequency Sweeps in the  
685 Pallid Bat Inferior Colliculus. *J Neurophysiol.* 1994;72(3):1061-79.
- 686 79. Beetz MJ, Hechavarría JC, Kössl M. Cortical neurons of bats respond best to echoes from  
687 nearest targets when listening to natural biosonar multi-echo streams. *Sci Rep-Uk.* 2016;6.
- 688 80. Beetz MJ, Hechavarría JC, Kössl M. Temporal tuning in the bat auditory cortex is sharper  
689 when studied with natural echolocation sequences. *Sci Rep-Uk.* 2016;6.
- 690 81. Beetz MJ, Kordes S, Garcia-Rosales F, Kössl M, Hechavarría JC. Processing of Natural  
691 Echolocation Sequences in the Inferior Colliculus of Seba's Fruit Eating Bat, *Carollia perspicillata*.  
692 *Eneuro.* 2017;4(6).
- 693 82. Henson OW, Pollak GD, Kobler JB, Henson MM, Goldman LJ. Cochlear Microphonic  
694 Potentials Elicited by Biosonar Signals in Flying Bats, *Pteronotus-P-Parnellii*. *Hearing Res.*  
695 1982;7(2):127-47.
- 696 83. Macias S, Mora EC, Hechavarría JC, Kössl M. Echo-level compensation and delay tuning in  
697 the auditory cortex of the mustached bat. *Eur J Neurosci.* 2016;43(12):1647-60.
- 698 84. Yovel Y, Melcon ML, Franz MO, Denzinger A, Schnitzler HU. The Voice of Bats: How  
699 Greater Mouse-eared Bats Recognize Individuals Based on Their Echolocation Calls. *Plos Comput*  
700 *Biol.* 2009;5(6).
